# Supplementary material for: Growth of turbostratic stacked graphene using waste ferric chloride solution as a feedstock
Source: Royal Society of Chemistry journal article supplement (doi:10.1039/d2ra02686d), 2022-01-01
Supplement: d2ra02686d1.pdf [file d2ra02686d1.pdf]

Electronic Supplementary Material (ESI) for RSC Advances.  
This journal is © The Royal Society of Chemistry 2022
