# Supplementary figures and images for: Growth of turbostratic stacked graphene using waste ferric chloride solution as a feedstock
Source: Royal Society of Chemistry journal article supplement (doi:10.1039/d2ra02686d), 2022-01-01

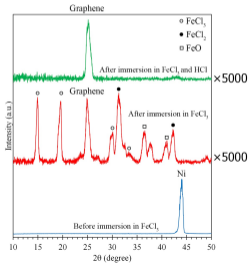

Supplement: d2ra02686d2.pdf [file d2ra02686d2.pdf]
